# Supplementary material
Source: PubMed Central journal article supplement (PMC1891214)

**A**

```
-304 GGGCGGCGGT CGGTGTGCTGCT GCTGGCCGGG GCCTCGAGGA AGGCGCGGGC
-254 CAGCTGGGGC CGGGTCTGCG TTCCAGAGGAG CTGCCACCGT TCCAGGGAGC
      fp1                                fp2
-204 AAGT CAGGCC GGGACGTAGC GCCTGCGCGG GAC CCTCACT T GCCACCAAG
      fp3                                fp4
-154 ACCC CCACAA ACCCCGCCCC ATCCTGCCTT ACGCCCGGCC CCAAGGTCGT
      fp5
-104 TCTCCCGACC CGGGGTCCCG CCC CAAGACC GTCCTC CCGC CCCGCCGCTT
      fp6
-54  GGTGGCGGCC GCATGCTGCG CGGATATAAA GG GTCGGGCC CACATCCCAG
-4   GGACCAGCGA GCGGCCTTGA GAGGCTCTGG CTCTTGCTTC TTAGGCGGCC
```

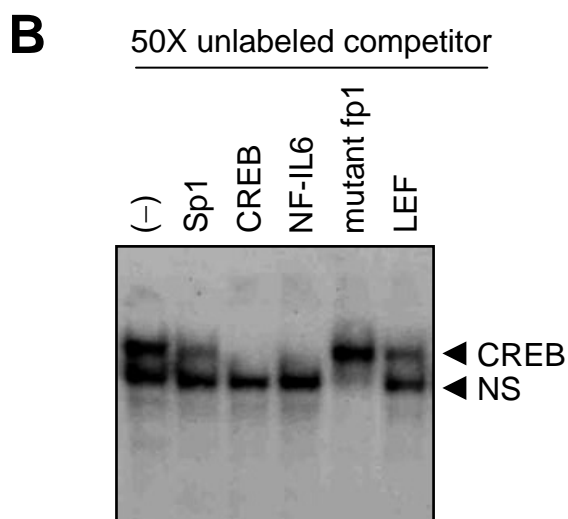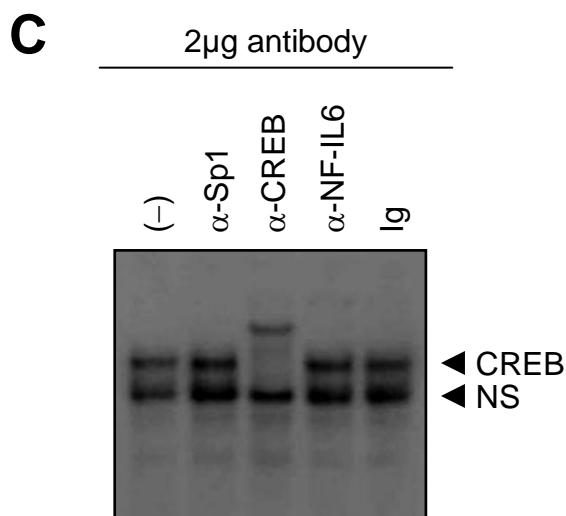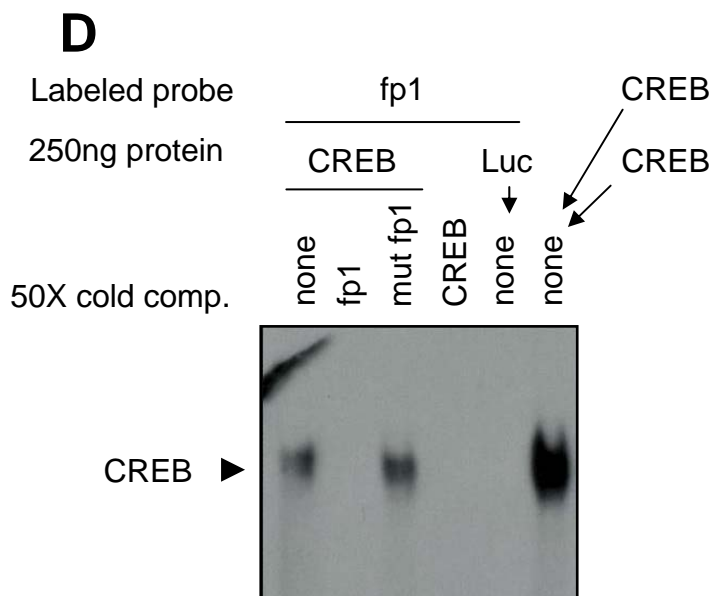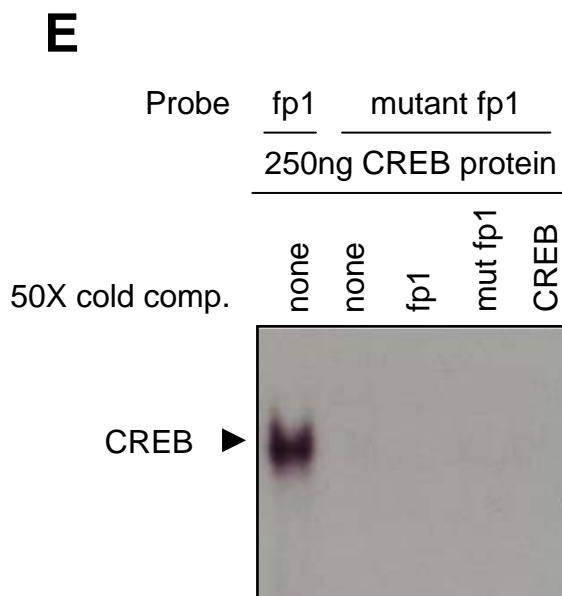

Supplement: pnas_0704170104_1.pdf [file pnas_0704170104_1.pdf]
