# Supplementary material
Source: PubMed Central journal article supplement (PMC1891214)

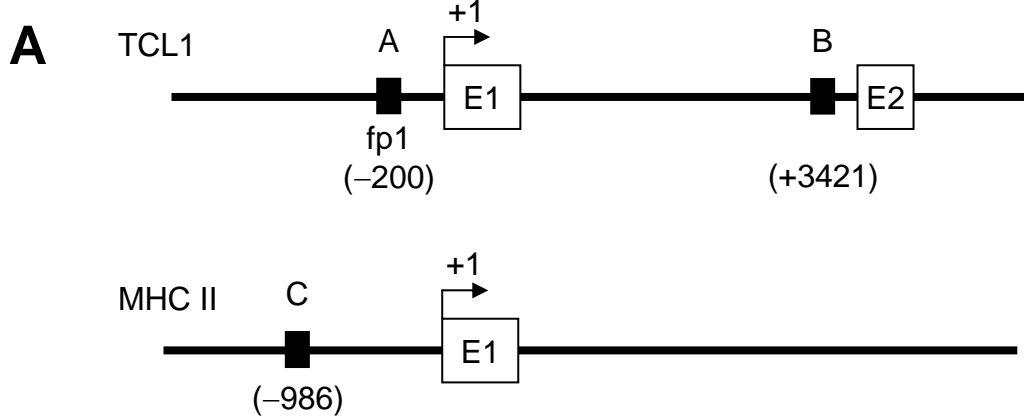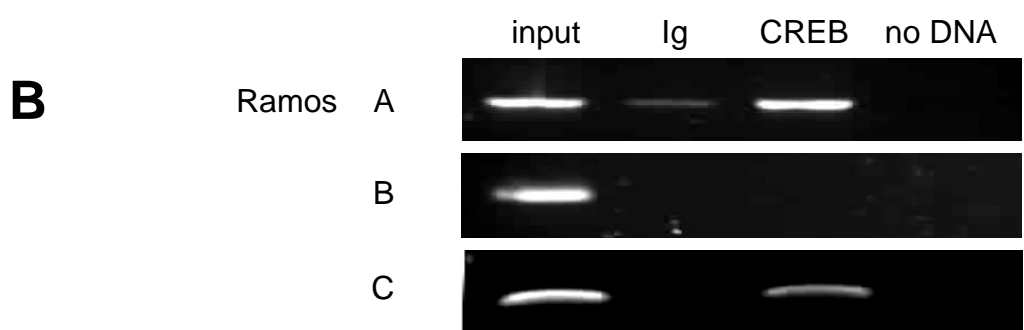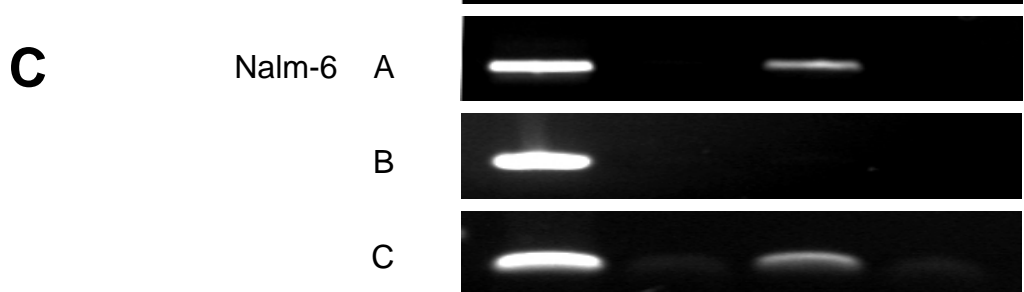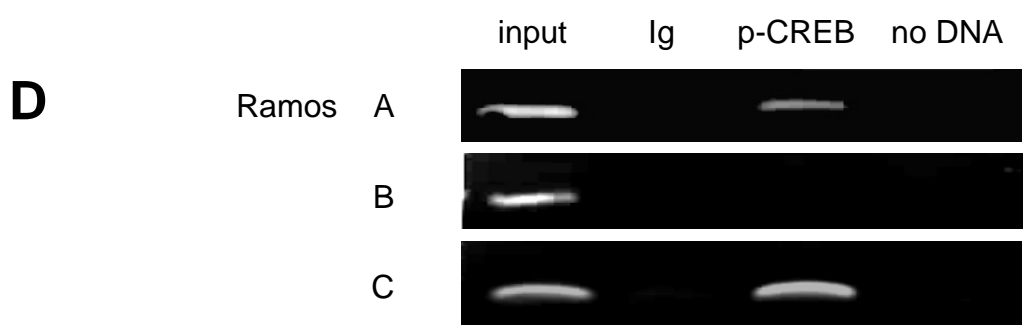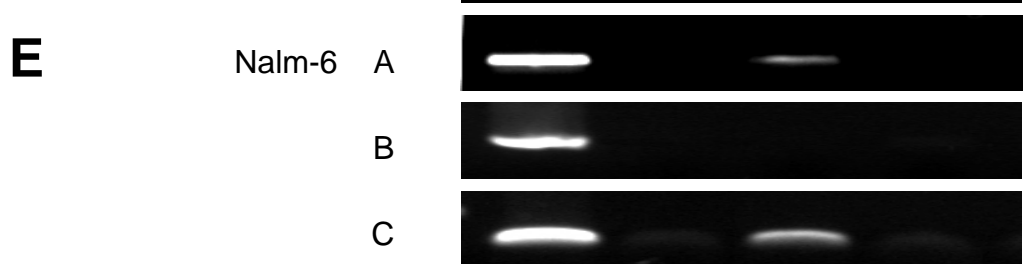

Supplement: pnas_0704170104_2.pdf [file pnas_0704170104_2.pdf]

**A**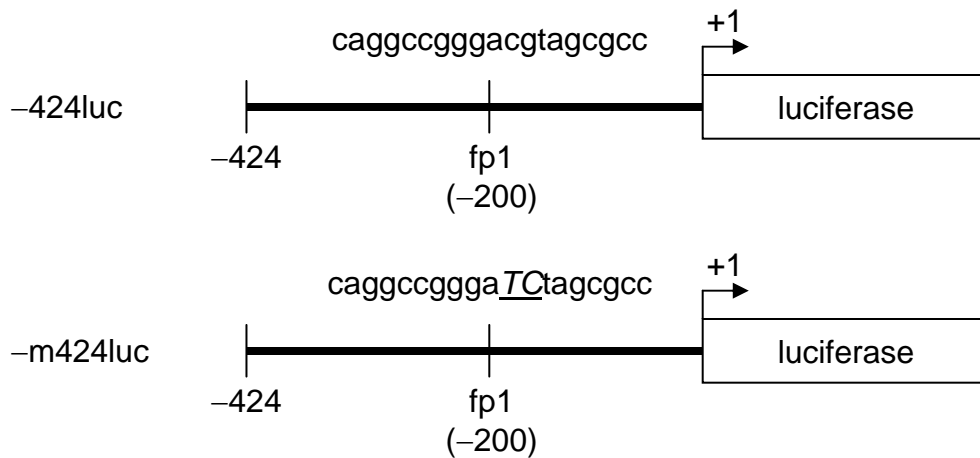**B**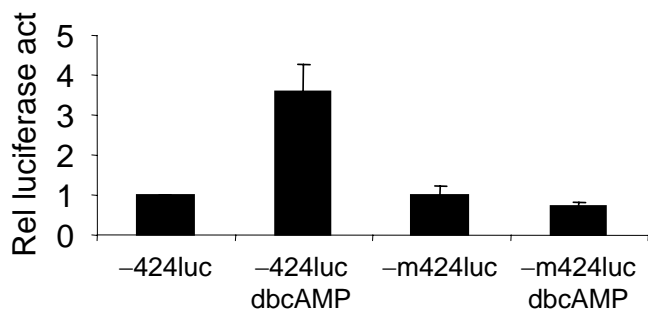**C**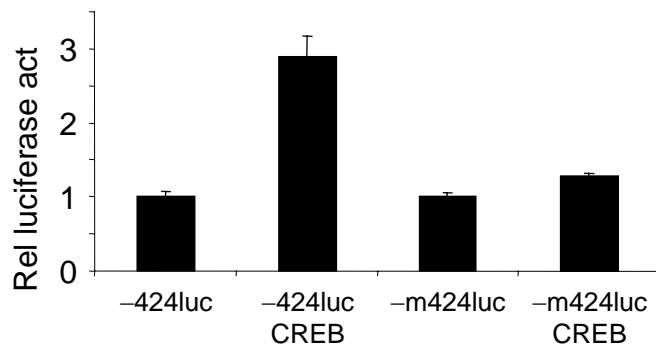**D**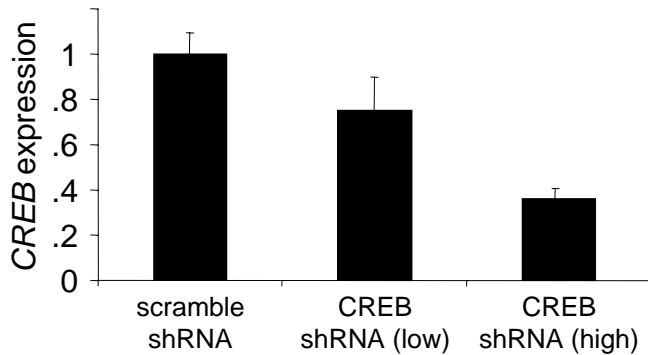**E**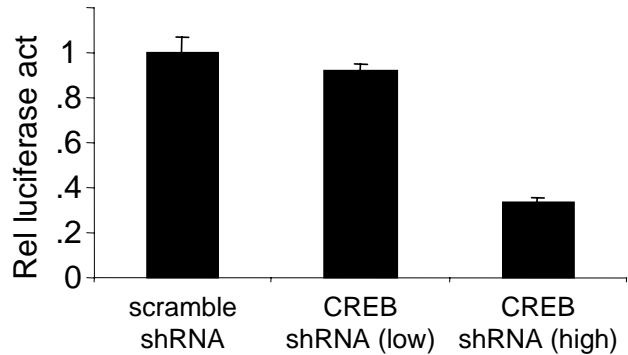

Supplement: pnas_0704170104_3.pdf [file pnas_0704170104_3.pdf]

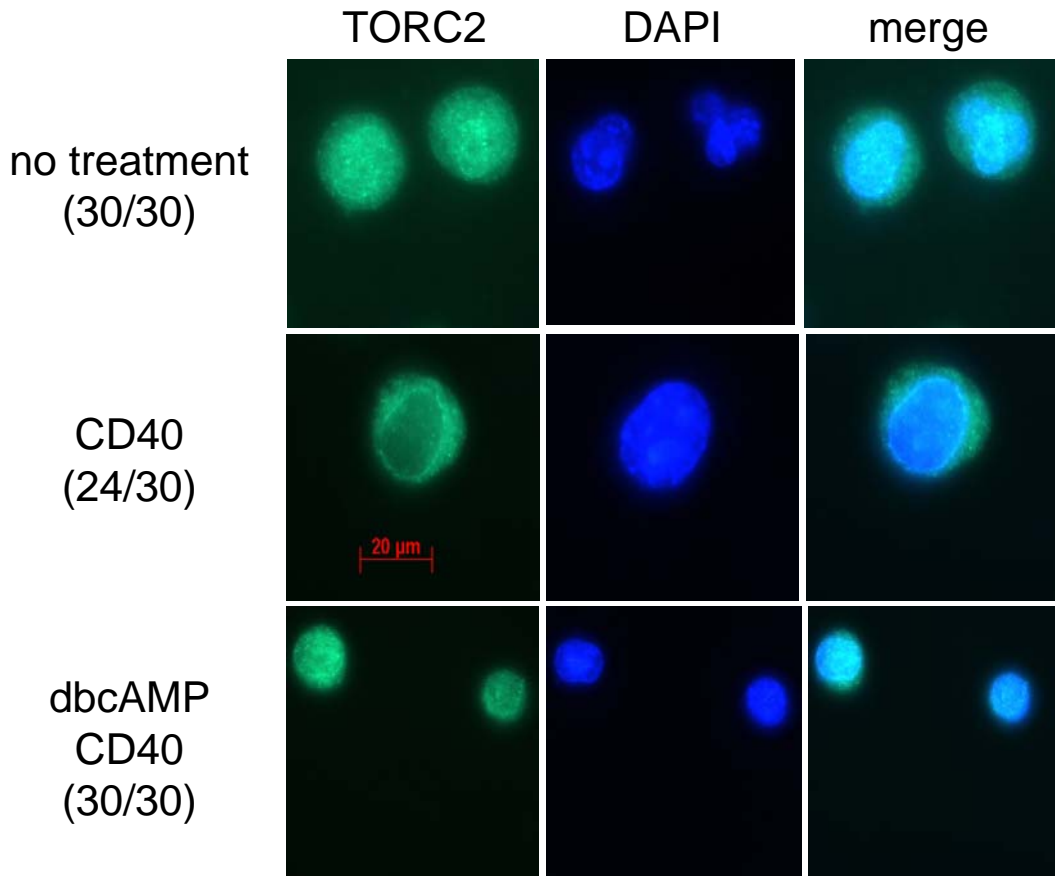

Supplement: pnas_0704170104_4.pdf [file pnas_0704170104_4.pdf]
